# Supplementary material
Source: PubMed Central journal article supplement (PMC4284203)

| Studies                                                 | Estimate (95% C.I.) |                               |  | (TP * TN) / (FP * FN) |
|---------------------------------------------------------|---------------------|-------------------------------|--|-----------------------|
| Oh Genedia                                              | 8470.714            | (432.836, 165774.157)         |  | 14700/0               |
| WHO Genedia                                             | 23443.000           | (946.034, 580924.218)         |  | 17444/0               |
| Whang Genedia                                           | 5599.286            | (285.470, 109825.763)         |  | 9700/0                |
| Cha Genedia                                             | 205.000             | (9.894, 4247.470)             |  | 340/0                 |
| <b>Subgroup Genedia (I<sup>2</sup>=42% , P=0.162)</b>   | <b>3795.233</b>     | <b>(516.840, 27868.976)</b>   |  | <b>42184/0</b>        |
| Palmer Determine                                        | 686.400             | (204.854, 2299.906)           |  | 20592/30              |
| Lien Determine                                          | 99405.000           | (1959.703, 5042271.244)       |  | 24687/0               |
| WHO Determine                                           | 17346.000           | (1073.141, 280376.633)        |  | 17346/1               |
| Lin Determine                                           | 50168.840           | (2962.431, 849610.574)        |  | 312936/0              |
| Randrianirina Determine                                 | 7840.200            | (371.608, 165412.982)         |  | 9701/0                |
| Davies Determine                                        | 5151.000            | (99.306, 267182.268)          |  | 1250/0                |
| ICBS Determine                                          | 16441.000           | (842.696, 320763.818)         |  | 28600/0               |
| Bottero Determine                                       | 61677.000           | (3139.073, 1211839.384)       |  | 106700/0              |
| Franzeck Determine                                      | 8085.000            | (320.650, 203858.304)         |  | 5928/0                |
| <b>Subgroup Determine (I<sup>2</sup>=59% , P=0.013)</b> | <b>11124.596</b>    | <b>(2638.360, 46906.657)</b>  |  | <b>527740/31</b>      |
| Kaur Hepacard                                           | 68833.889           | (3663.067, 1293480.239)       |  | 153501/0              |
| WHO Hepacard                                            | 4263.000            | (469.884, 38675.904)          |  | 17052/4               |
| Raj Hepacard                                            | 416.705             | (121.659, 1427.294)           |  | 18335/44              |
| Torane Hepacard                                         | 47.057              | (2.633, 840.989)              |  | 390/0                 |
| ICBS Hepacard                                           | 16441.000           | (842.696, 320763.818)         |  | 28600/0               |
| Maity Hepacard                                          | 9801.000            | (190.598, 503990.889)         |  | 2400/0                |
| <b>Subgroup Hepacard (I<sup>2</sup>=75% , P=0.001)</b>  | <b>2668.365</b>     | <b>(349.007, 20401.213)</b>   |  | <b>220278/48</b>      |
| Clement Binax NOW                                       | 107937.000          | (9753.380, 1194498.261)       |  | 215874/2              |
| Lau Binax NOW                                           | 85179.706           | (4894.106, 1482514.363)       |  | 360786/0              |
| Akanmu Binax NOW                                        | 935.000             | (34.975, 24995.504)           |  | 651/0                 |
| <b>Subgroup Binax NOW (I<sup>2</sup>=66% , P=0.053)</b> | <b>24151.706</b>    | <b>(1466.112, 397858.467)</b> |  | <b>577311/2</b>       |
| Cha SD                                                  | 73.800              | (3.886, 1401.565)             |  | 260/0                 |
| ICBS SD                                                 | 16441.000           | (842.696, 320763.818)         |  | 28600/0               |
| Maity SD                                                | 9801.000            | (190.598, 503990.889)         |  | 2400/0                |
| <b>Subgroup SD (I<sup>2</sup>=73% , P=0.025)</b>        | <b>2099.956</b>     | <b>(57.010, 77351.617)</b>    |  | <b>31260/0</b>        |
| <b>Overall (I<sup>2</sup>=66% , P=0.000)</b>            | <b>6005.786</b>     | <b>(2365.783, 15246.310)</b>  |  | <b>1398773/81</b>     |

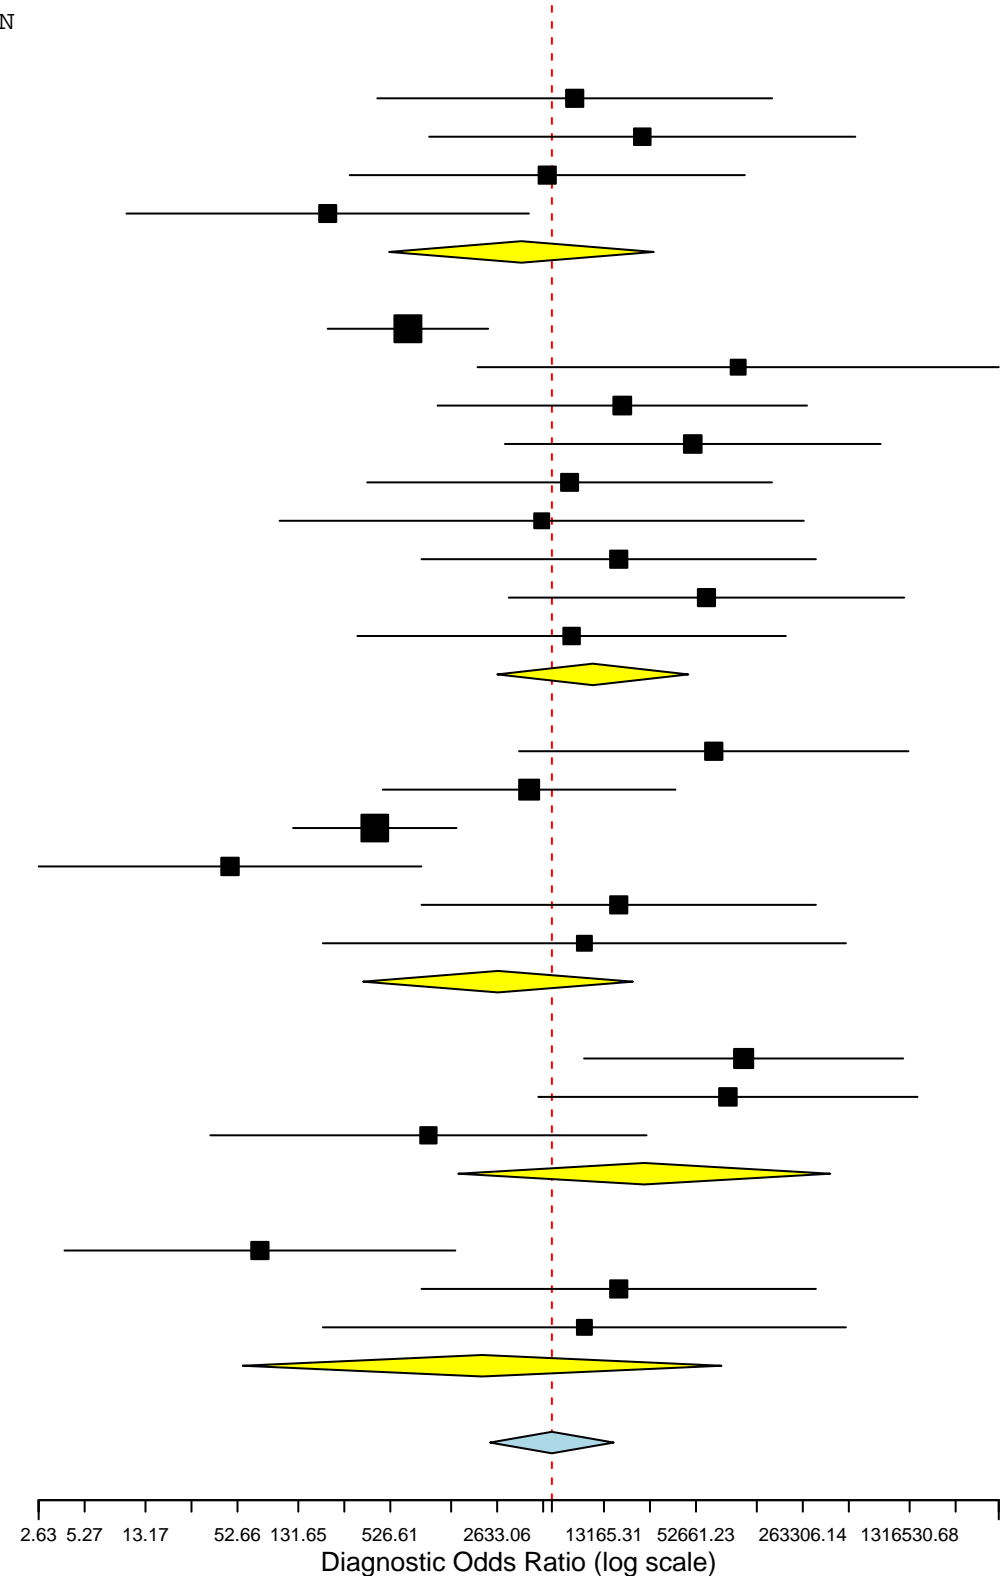

Supplement: mmc8.pdf [file mmc8.pdf]
