# Supplementary material
Source: PubMed Central journal article supplement (PMC4284203)

| Studies                                                 | Estimate (95% C.I.) |                             | (TP * TN) / (FP * FN) |
|---------------------------------------------------------|---------------------|-----------------------------|-----------------------|
| Oh Genedia                                              | 8470.714            | (432.836, 165774.157)       | 14700/0               |
| Whang Genedia                                           | 5599.286            | (285.470, 109825.763)       | 9700/0                |
| Cha Genedia                                             | 205.000             | (9.894, 4247.470)           | 340/0                 |
| <b>Subgroup Genedia (I<sup>2</sup>=43% , P=0.172)</b>   | <b>2170.009</b>     | <b>(218.904, 21511.465)</b> | <b>24740/0</b>        |
| Palmer Determine                                        | 686.400             | (204.854, 2299.906)         | 20592/30              |
| Lien Determine                                          | 99405.000           | (1959.703, 5042271.244)     | 24687/0               |
| Lin Determine                                           | 50168.840           | (2962.431, 849610.574)      | 312936/0              |
| Randrianirina Determine                                 | 7840.200            | (371.608, 165412.982)       | 9701/0                |
| Franzeck Determine                                      | 8085.000            | (320.650, 203858.304)       | 5928/0                |
| <b>Subgroup Determine (I<sup>2</sup>=70% , P=0.011)</b> | <b>8505.578</b>     | <b>(993.074, 72849.436)</b> | <b>373844/30</b>      |
| Kaur Hepacard                                           | 68833.889           | (3663.067, 1293480.239)     | 153501/0              |
| Raj Hepacard                                            | 416.705             | (121.659, 1427.294)         | 18335/44              |
| Torane Hepacard                                         | 47.057              | (2.633, 840.989)            | 390/0                 |
| Maity Hepacard                                          | 9801.000            | (190.598, 503990.889)       | 2400/0                |
| <b>Subgroup Hepacard (I<sup>2</sup>=80% , P=0.002)</b>  | <b>1606.508</b>     | <b>(89.245, 28918.812)</b>  | <b>174626/44</b>      |
| Cha SD                                                  | 73.800              | (3.886, 1401.565)           | 260/0                 |
| Maity SD                                                | 9801.000            | (190.598, 503990.889)       | 2400/0                |
| <b>Subgroup SD (I<sup>2</sup>=74% , P=0.051)</b>        | <b>708.563</b>      | <b>(5.963, 84193.586)</b>   | <b>2660/0</b>         |
| <b>Overall (I<sup>2</sup>=67% , P=0.000)</b>            | <b>2644.037</b>     | <b>(782.091, 8938.772)</b>  | <b>575870/74</b>      |

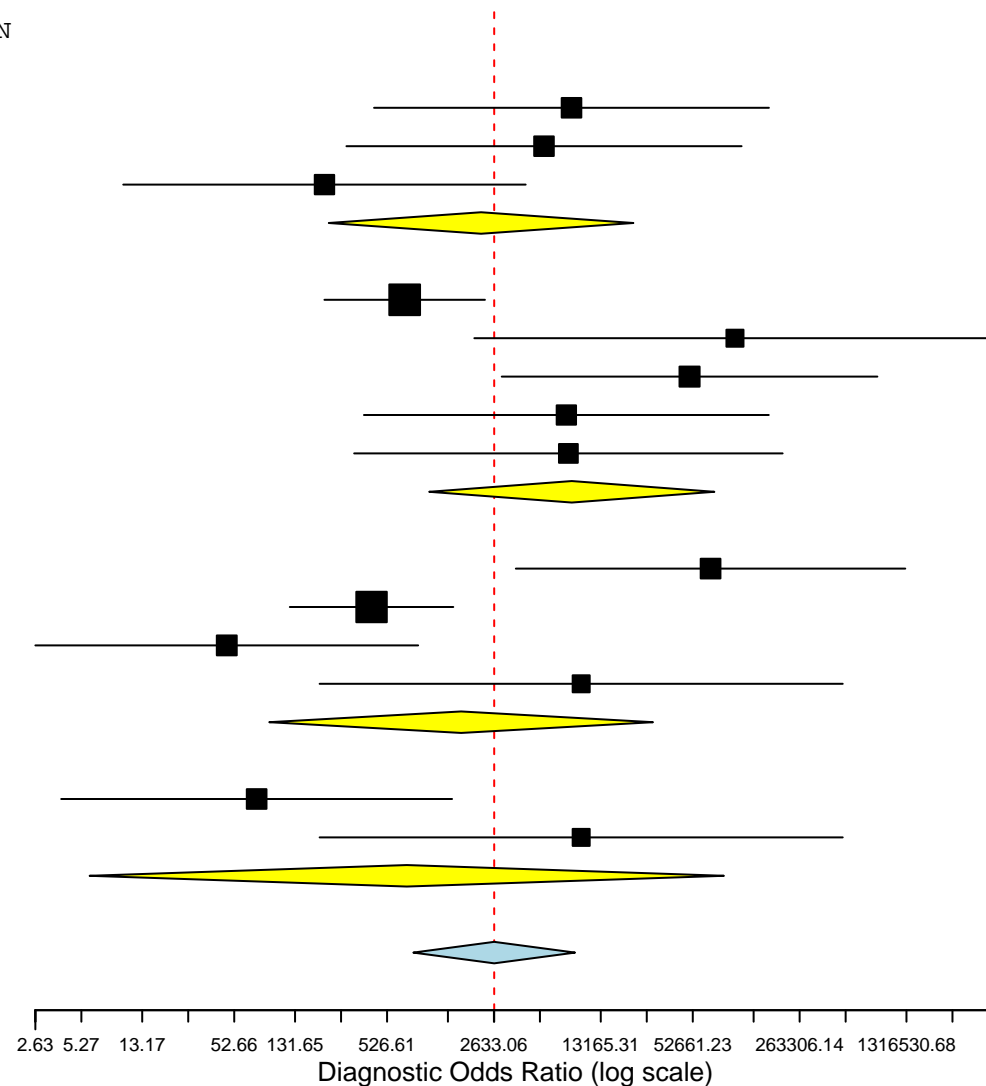

Supplement: mmc10.pdf [file mmc10.pdf]
