# Supplementary material
Source: PubMed Central journal article supplement (PMC4284203)

| Studies                                                | Estimate (95% C.I.)                      | (TP * TN) / (FP * FN) |
|--------------------------------------------------------|------------------------------------------|-----------------------|
| WHO Determine                                          | 17346.000 (1073.141, 280376.633)         | 17346/1               |
| Davies Determine                                       | 5151.000 (99.306, 267182.268)            | 1250/0                |
| ICBS Determine                                         | 16441.000 (842.696, 320763.818)          | 28600/0               |
| Bottero Determine                                      | 61677.000 (3139.073, 1211839.384)        | 106700/0              |
| <b>Subgroup Determine (I<sup>2</sup>=0% , P=0.794)</b> | <b>19971.535 (4263.255, 93558.143)</b>   | <b>153896/1</b>       |
| WHO Hepacard                                           | 4263.000 (469.884, 38675.904)            | 17052/4               |
| ICBS Hepacard                                          | 16441.000 (842.696, 320763.818)          | 28600/0               |
| <b>Subgroup Hepacard (I<sup>2</sup>=0% , P=0.475)</b>  | <b>6885.941 (1172.036, 40456.251)</b>    | <b>45652/4</b>        |
| Clement Binax NOW                                      | 107937.000 (9753.380, 1194498.261)       | 215874/2              |
| Lau Binax NOW                                          | 85179.706 (4894.106, 1482514.363)        | 360786/0              |
| <b>Subgroup Binax NOW (I<sup>2</sup>=0% , P=0.901)</b> | <b>97845.156 (15549.680, 615683.067)</b> | <b>576660/2</b>       |
| <b>Overall (I<sup>2</sup>=0% , P=0.569)</b>            | <b>22649.711 (8470.967, 60560.897)</b>   | <b>776208/7</b>       |

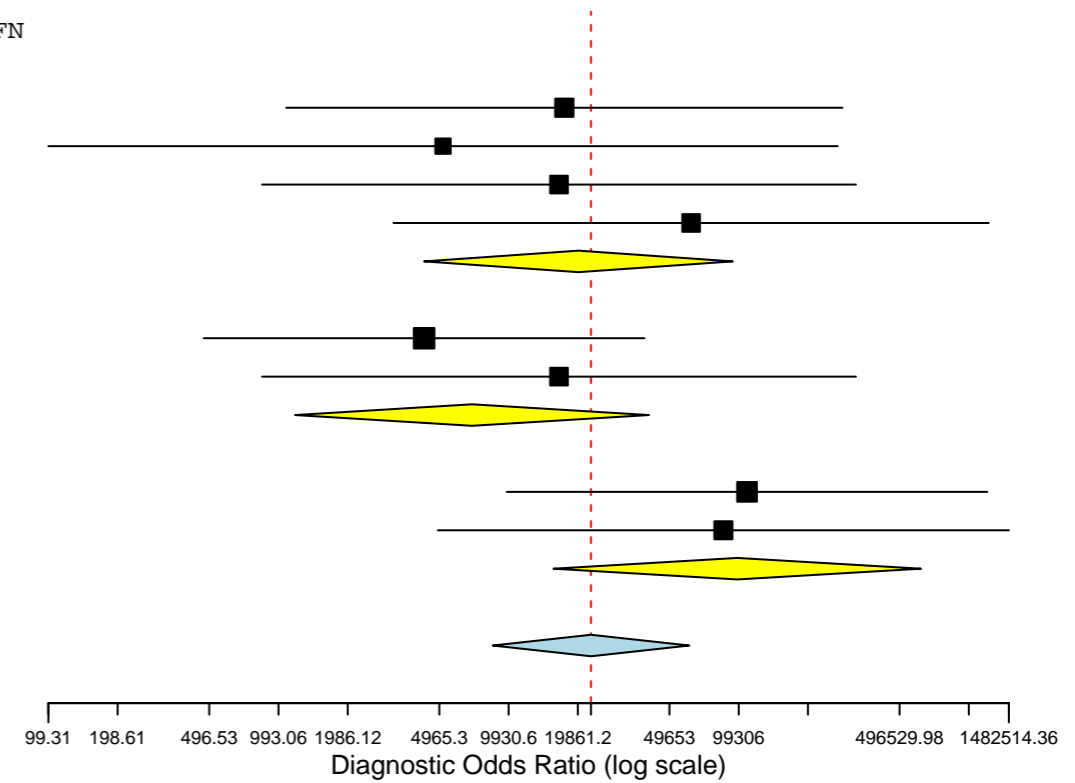

Supplement: mmc9.pdf [file mmc9.pdf]
