# Supplementary material
Source: PubMed Central journal article supplement (PMC4284203)

## Sensitivity

## Specificity

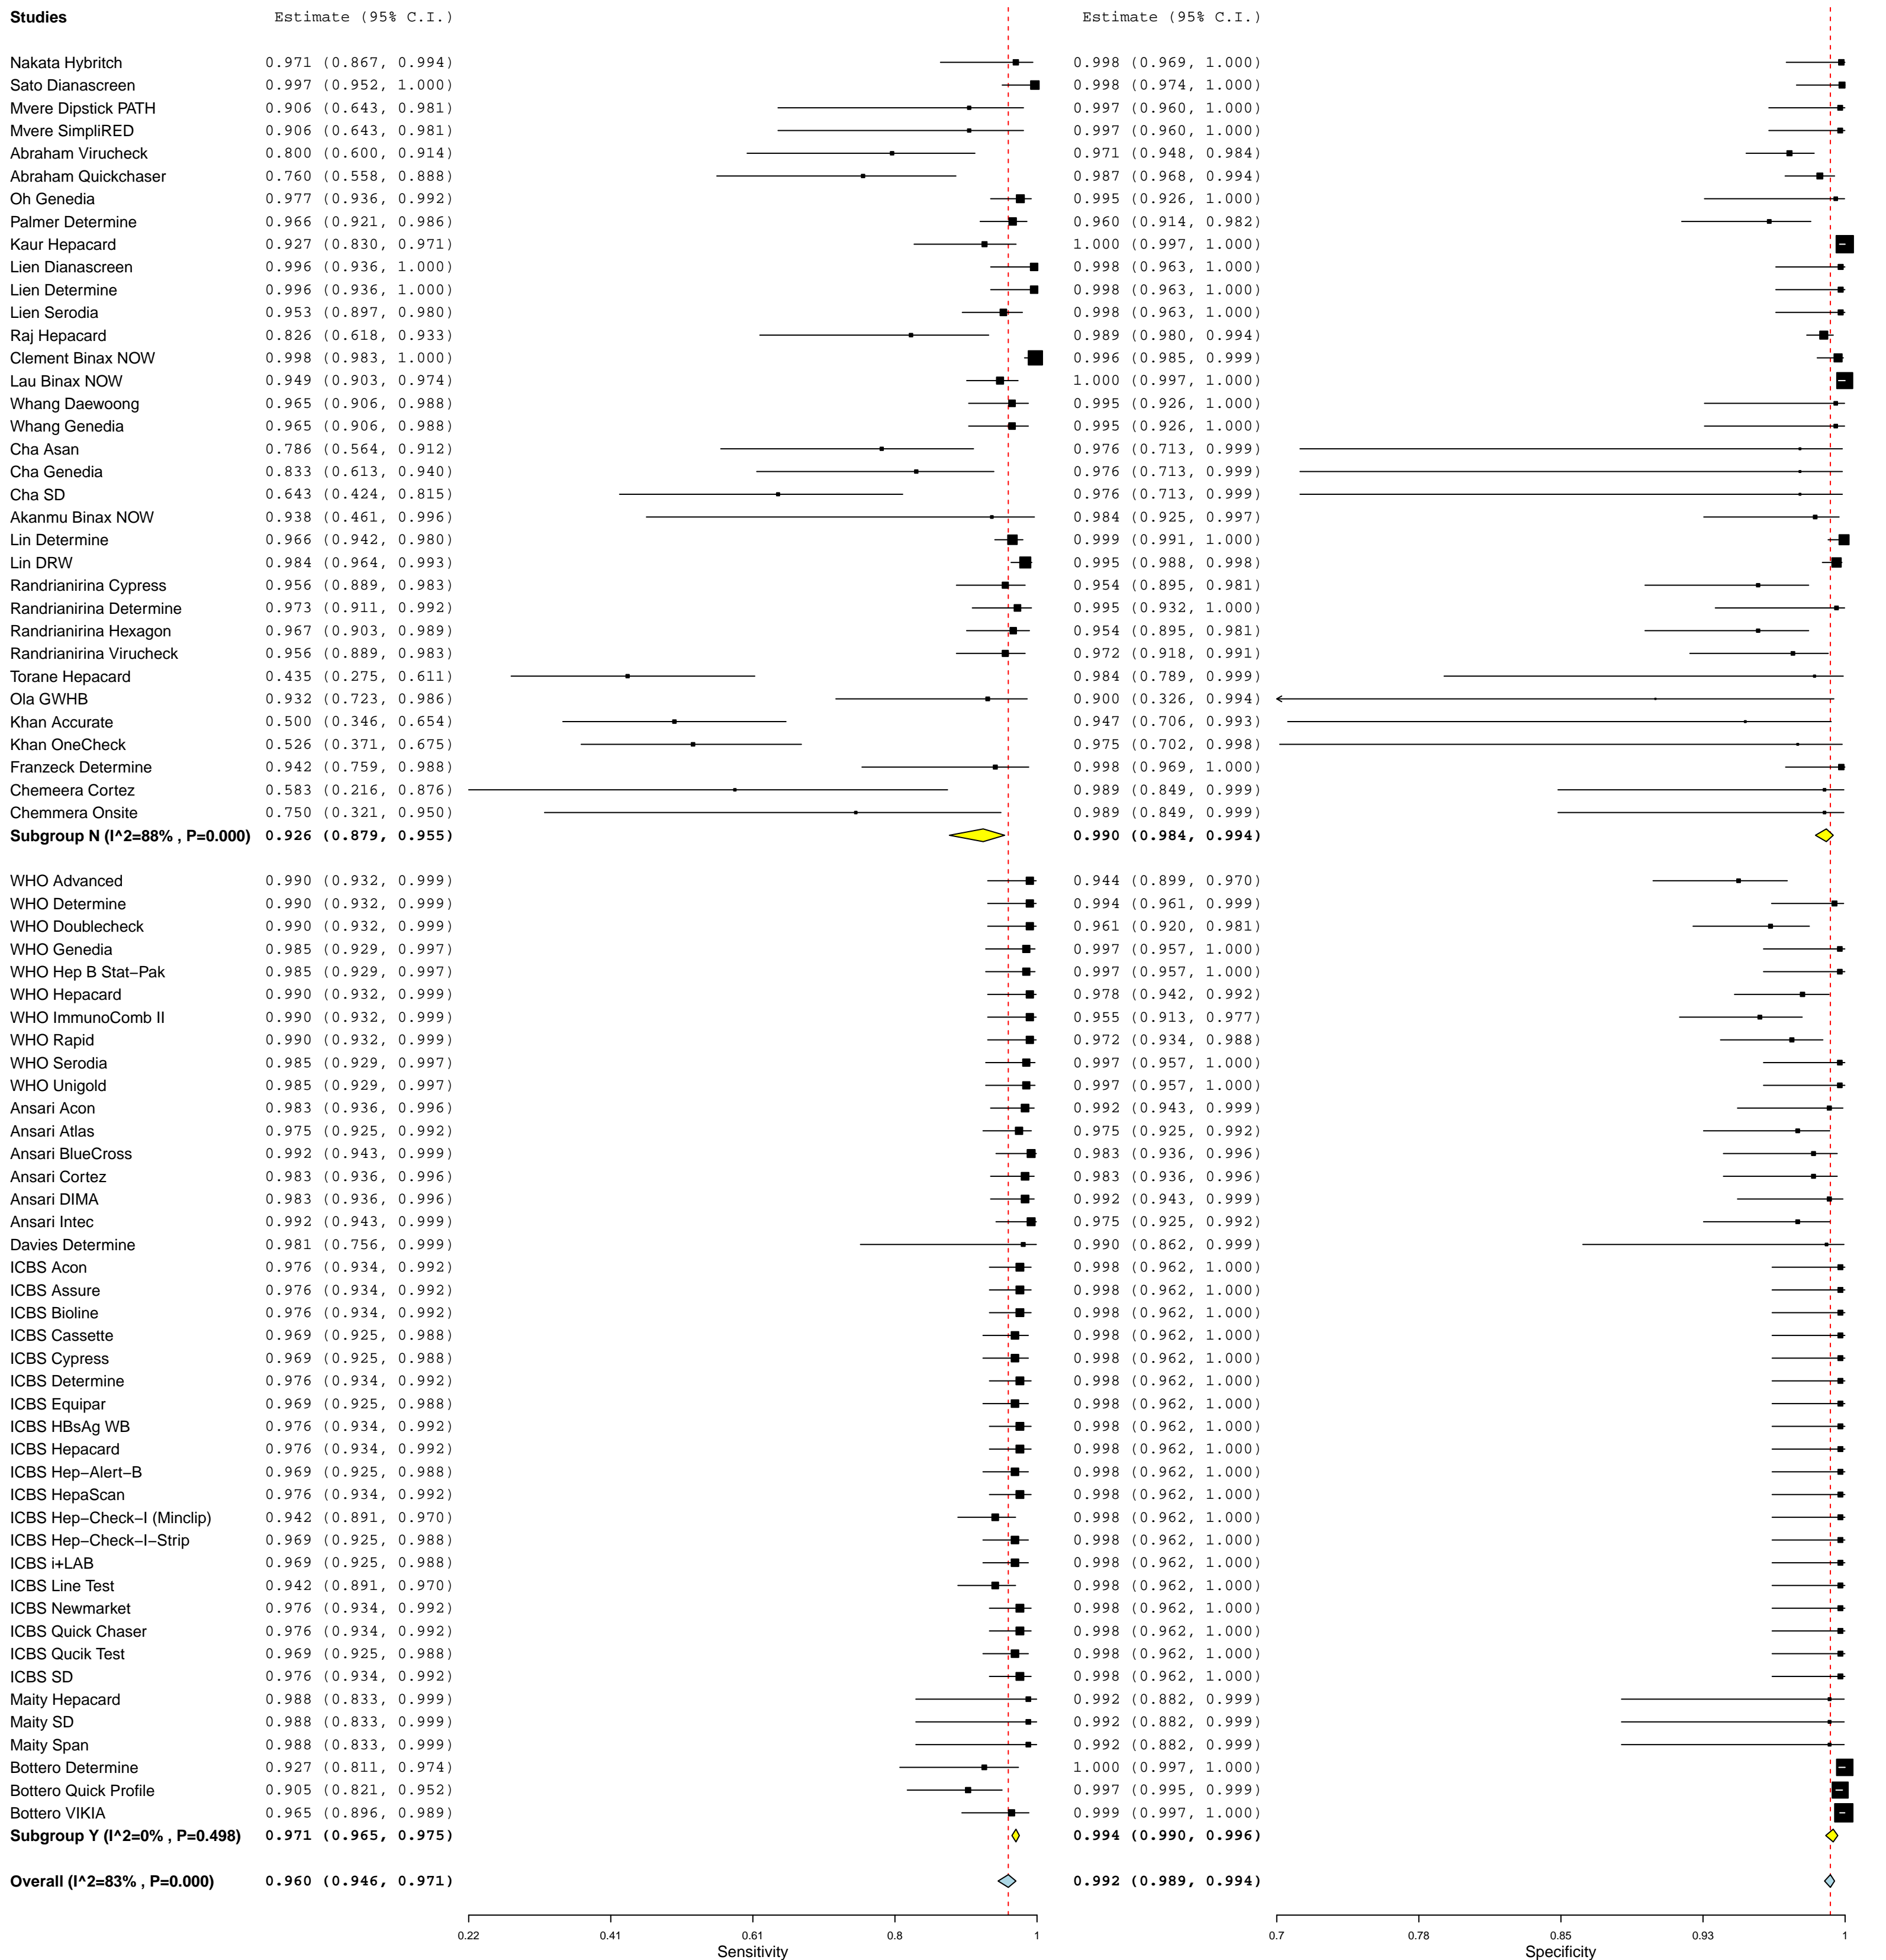

Supplement: mmc6.pdf [file mmc6.pdf]

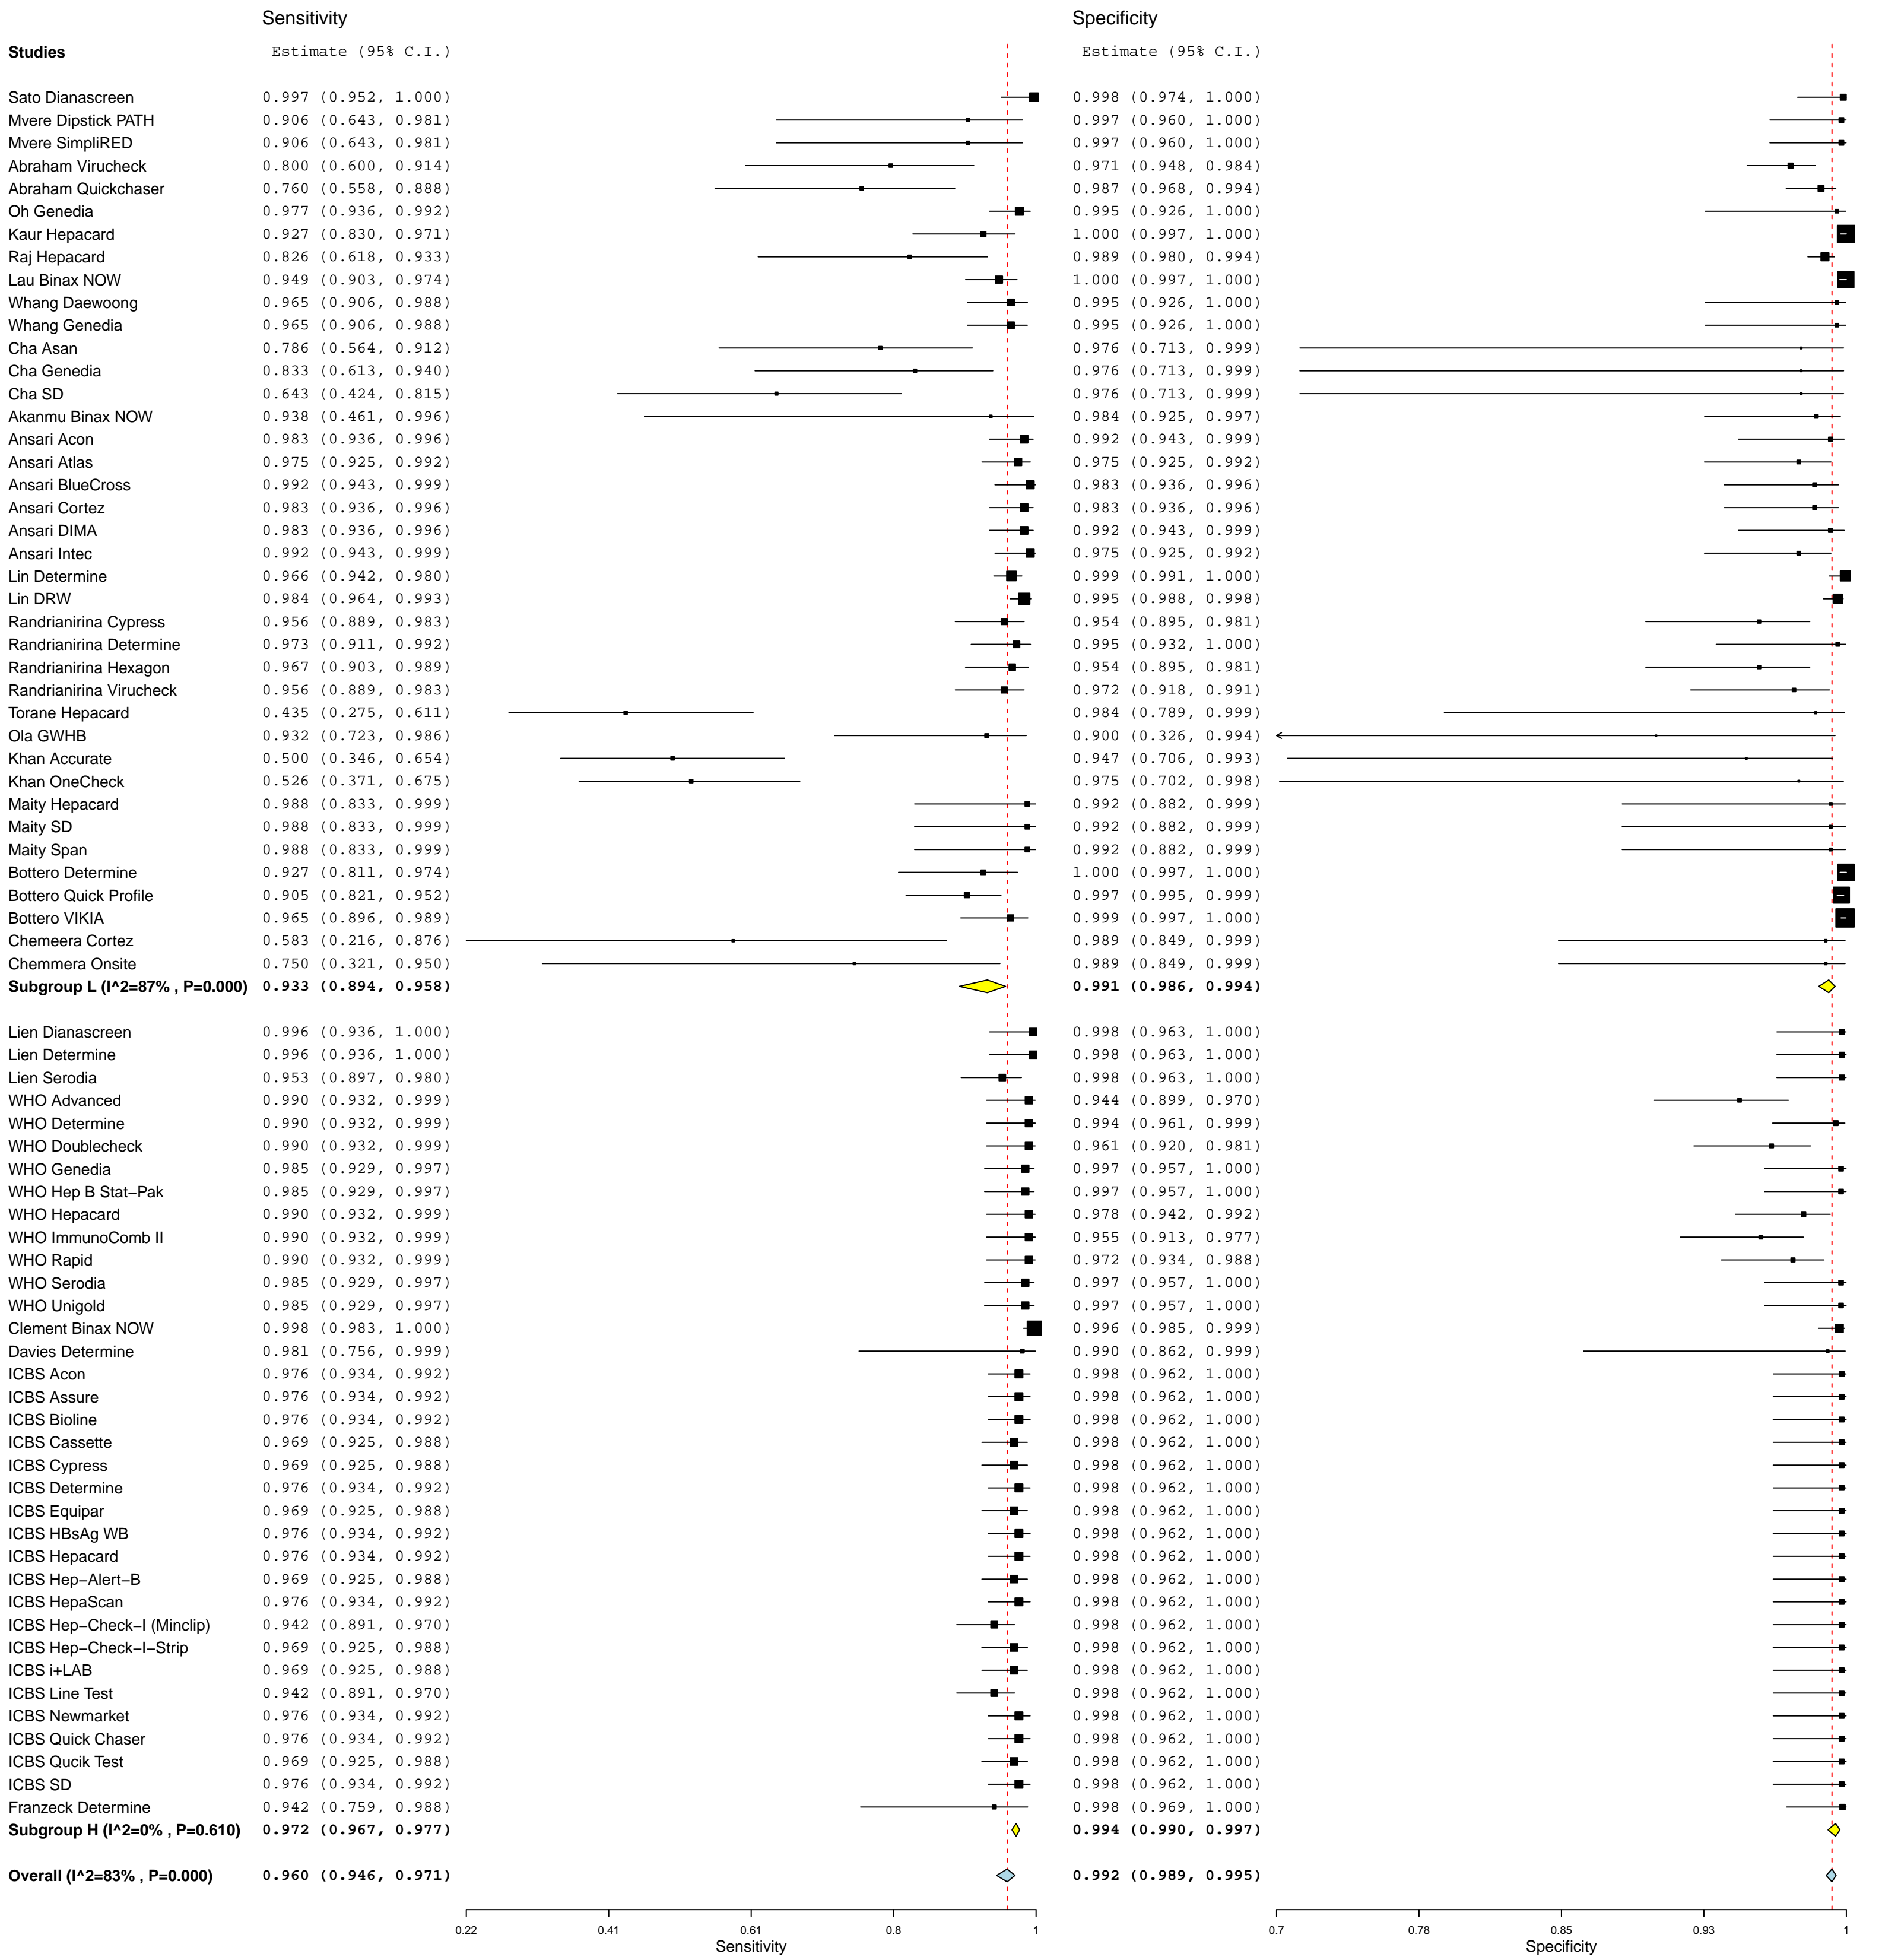

Supplement: mmc7.pdf [file mmc7.pdf]
